# Supplementary material for: Shallow epifaunal sea cucumber densities and their relationship with the benthic community in the Okinawa Islands
Source: PeerJ. 2022 Oct 6;10:e14181. doi: 10.7717/peerj.14181 (PMC9548317; doi:10.7717/peerj.14181)
Supplement: Supplemental Information 4 [file peerj-10-14181-s004.xlsx]

## Sheet: Table S1
Site	Date	Point	Time	Depth (m)	Temprature (℃)	GPS coordinates
Chatan	2020-09-11	1st transect start	14:06:00	1.4	29	26°20.108'N 127°44.675'E
Chatan	2020-09-11	1st transect end	-	1	29	26°20.155'N 127°44.674'E
Chatan	2020-09-11	2nd transect start	-	1.4~1.8	29	26°20.105'N 127°44.659'E
Chatan	2020-09-11	2nd transect end	-	1.4~1.8	29	26°20.111'N 127°44.660'E
Chatan	2020-09-11	3rd transect start	-	1.4~1.8	29	26°20.109'N 127°44.655'E
Chatan	2020-09-11	3rd transect end	-	1.4~1.8	29	26°20.115'N 127°44.655'E
Chatan	2020-09-11	4th transect start	-	1.4~1.8	29	26°20.111'N 127°44.653'E
Chatan	2020-09-11	4th transect end	-	1.4~1.8	29	26°20.117'N 127°44.651'E
Chatan	2020-09-11	5th transect start	-	1.4~1.8	29	26°20.120'N 127°44.656'E
Chatan	2020-09-11	5th transect end	-	1.4~1.8	29	26°20.125'N 127°44.657'E
Chatan	2020-09-11	6th transect start	-	1.4~1.8	29	26°20.133'N 127°44.656'E
Chatan	2020-09-11	6th transect end	-	1.4~1.8	29	26°20.139'N 127°44.656'E
Chatan	2020-09-11	1st swim start	15:11:00	-	-	26°20.142'N 127°44.671'E
Chatan	2020-09-11	1st swim end	15:21:00	-	-	26°20.094'N 127°44.671'E
Chatan	2020-09-11	2nd swim start	15:25:00	-	-	26°20.093'N 127°44.653'E
Chatan	2020-09-11	2nd swim end	15:35:00	-	-	26°20.129'N 127°44.659'E
Chatan	2020-09-11	3rd swim start	15:37:00	-	-	26°20.131'N 127°44.646'E
Chatan	2020-09-11	3rd swim end	15:47:00	-	-	26°20.093'N 127°44.648'E
Chatan	2020-09-11	4th swim start	15:50:00	-	-	26°20.091'N 127°44.629'E
Chatan	2020-09-11	4th swim end	16:00:00	-	-	26°20.145'N 127°44.632'E
Chatan	2020-09-11	5th swim start	16:03:00	-	-	26°20.143'N 127°44.615'E
Chatan	2020-09-11	5th swim end	16:12:00	-	-	26°20.094'N 127°44.624'E
Uruma	2020-09-14	1st transect start	15:22:00	1.7	30	26°19.952'N 127°55.309'E
Uruma	2020-09-14	1st transect end	15:28:00	1.7	30	26°19.954'N 127°55.308'E
Uruma	2020-09-14	2nd transect start	15:32:00	1.7	30	26°19.957'N 127°55.303'E
Uruma	2020-09-14	2nd transect end	15:38:00	1.8	30	26°19.955'N 127°55.297'E
Uruma	2020-09-14	3rd transect start	15:42:00	1.8	30	26°19.953'N 127°55.292'E
Uruma	2020-09-14	3rd transect end	15:49:00	1.9	30	26°19.952'N 127°55.285'E
Uruma	2020-09-14	4th transect start	15:53:00	1.8	30	26°19.950'N 127°55.284'E
Uruma	2020-09-14	4th transect end	16:00:00	1.9	30	26°19.949'N 127°55.278'E
Uruma	2020-09-14	5th transect start	16:06:00	1.9	30	26°19.941'N 127°55.280'E
Uruma	2020-09-14	5th transect end	16:13:00	1.8	30	26°19.940'N 127°55.274'E
Uruma	2020-09-14	6th transect start	16:17:00	1.7	30	26°19.934'N 127°55.273'E
Uruma	2020-09-14	6th transect end	16:23:00	1.9	30	26°19.933'N 127°55.268'E
Uruma	2020-09-14	1st swim start	16:36:00	-	-	26°19.945'N 127°55.302'E
Uruma	2020-09-14	1st swim end	16:46:00	-	-	26°19.951'N 127°55.253'E
Uruma	2020-09-14	2nd swim start	16:48:00	-	-	26°19.965'N 127°55.249'E
Uruma	2020-09-14	2nd swim end	16:58:00	-	-	26°19.969'N 127°55.298'E
Uruma	2020-09-14	3rd swim start	17:01:00	-	-	26°19.989'N 127°55.298'E
Uruma	2020-09-14	3rd swim end	17:11:00	-	-	26°19.995'N 127°55.240'E
Uruma	2020-09-14	4th swim start	17:13:00	-	-	26°20.007'N 127°55.239'E
Uruma	2020-09-14	4th swim end	17:23:00	-	-	26°20.001'N 127°55.292'E
Uruma	2020-09-14	5th swim start	17:25:00	-	-	26°20.015'N 127°55.295'E
Uruma	2020-09-14	5th swim end	17:35:00	-	-	26°20.025'N 127°55.251'E
Kin	2020-09-18	1st transect start	09:08:00	1.5	29	26°26.836'N 127°56.671'E
Kin	2020-09-18	1st transect end	09:16:00	1.4	29	26°26.842'N 127°56.672'E
Kin	2020-09-18	2nd transect start	09:20:00	1.5	29	26°26.843'N 127°56.676'E
Kin	2020-09-18	2nd transect end	09:26:00	1.4	29	26°26.848'N 127°56.675'E
Kin	2020-09-18	3rd transect start	09:30:00	1.5	29	26°26.852'N 127°56.691'E
Kin	2020-09-18	3rd transect end	09:36:00	1.4	29	26°26.858'N 127°56.690'E
Kin	2020-09-18	4th transect start	09:39:00	1.4	29	26°26.858'N 127°56.694'E
Kin	2020-09-18	4th transect end	09:45:00	1.2	29	26°26.864'N 127°56.693'E
Kin	2020-09-18	5th transect start	09:53:00	1.4	29	26°26.841'N 127°56.713'E
Kin	2020-09-18	5th transect end	09:59:00	1.2	29	26°26.836'N 127°56.714'E
Kin	2020-09-18	6th transect start	10:05:00	1.4	29	26°26.834'N 127°56.721'E
Kin	2020-09-18	6th transect end	10:09:00	1	29	26°26.839'N 127°56.722'E
Kin	2020-09-18	1st swim start	10:14:00	-	-	26°26.839'N 127°56.723'E
Kin	2020-09-18	1st swim end	10:24:00	-	-	26°26.777'N 127°56.734'E
Kin	2020-09-18	2nd swim start	10:27:00	-	-	26°26.775'N 127°56.756'E
Kin	2020-09-18	2nd swim end	10:37:00	-	-	26°26.863'N 127°56.764'E
Kin	2020-09-18	3rd swim start	10:40:00	-	-	26°26.837'N 127°56.781'E
Kin	2020-09-18	3rd swim end	10:50:00	-	-	26°26.770'N 127°56.787'E
Kin	2020-09-18	4th swim start	10:52:00	-	-	26°26.769'N 127°56.808'E
Kin	2020-09-18	4th swim end	11:02:00	-	-	26°26.836'N 127°56.817'E
Kin	2020-09-18	5th swim start	11:05:00	-	-	26°26.832'N 127°56.840'E
Kin	2020-09-18	5th swim end	11:15:00	-	-	26°26.755'N 127°56.843'E
Odo	2020-09-23	1st transect start	10:28:00	1.8	29	26°05.341'N 127°42.624'E
Odo	2020-09-23	1st transect end	10:35:00	1.9	29	26°05.312'N 127°42.589'E
Odo	2020-09-23	2nd transect start	10:41:00	2.1	28	26°05.314'N 127°42.584'E
Odo	2020-09-23	2nd transect end	10:50:00	1.9	28	26°05.313'N 127°42.577'E
Odo	2020-09-23	3rd transect start	10:56:00	2	28	26°05.312'N 127°42.573'E
Odo	2020-09-23	3rd transect end	11:08:00	2	29	26°05.312'N 127°42.567'E
Odo	2020-09-23	4th transect start	11:15:00	2	29	26°05.311'N 127°42.567'E
Odo	2020-09-23	4th transect end	11:27:00	1.9	29	26°05.310'N 127°42.560'E
Odo	2020-09-23	5th transect start	11:33:00	2	29	26°05.307'N 127°42.554'E
Odo	2020-09-23	5th transect end	11:44:00	2.1	29	26°05.307'N 127°42.548'E
Odo	2020-09-23	6th transect start	11:56:00	1.6	29	26°05.301'N 127°42.541'E
Odo	2020-09-23	6th transect end	12:02:00	1.7	29	26°05.299'N 127°42.535'E
Odo	2020-09-23	1st swim start	12:13:00	-	-	26°05.336'N 127°42.568'E
Odo	2020-09-23	1st swim end	12:23:00	-	-	26°05.325'N 127°42.457'E
Odo	2020-09-23	2nd swim start	12:26:00	-	-	26°05.311'N 127°42.457'E
Odo	2020-09-23	2nd swim end	12:36:00	-	-	26°05.305'N 127°42.560'E
Odo	2020-09-23	3rd swim start	12:38:00	-	-	26°05.293'N 127°42.567'E
Odo	2020-09-23	3rd swim end	12:48:00	-	-	26°05.287'N 127°42.456'E
Odo	2020-09-23	4th swim start	12:53:00	-	-	26°05.301'N 127°42.442'E
Odo	2020-09-23	4th swim end	12:59:00	-	-	26°05.303'N 127°42.389'E
Odo	2020-09-23	5th swim start	13:01:00	-	-	26°05.323'N 127°42.393'E
Odo	2020-09-23	5th swim end	13:06:00	-	-	26°05.316'N 127°42.349'E
Odo	2020-09-23	6th swim start	13:10:00	-	-	26°05.332'N 127°42.345'E
Odo	2020-09-23	6th swim end	13:20:00	-	-	26°05.365'N 127°42.441'E
Kayou	2020-09-25	1st transect start	14:45:00	2.3	29	26°32.821'N 128°06.304'E
Kayou	2020-09-25	1st transect end	14:52:00	2.1	29	26°32.659'N 128°06.174'E
Kayou	2020-09-25	2nd transect start	14:56:00	2.1	29	26°32.667'N 128°06.184'E
Kayou	2020-09-25	2nd transect end	15:03:00	2.1	29	26°32.667'N 128°06.184'E
Kayou	2020-09-25	3rd transect start	15:08:00	2.3	29	26°32.670'N 128°06.193'E
Kayou	2020-09-25	3rd transect end	15:15:00	2.1	29	26°32.673'N 128°06.197'E
Kayou	2020-09-25	4th transect start	15:20:00	2	29	26°32.680'N 128°06.200'E
Kayou	2020-09-25	4th transect end	15:26:00	1.8	29	26°32.683'N 128°06.205'E
Kayou	2020-09-25	5th transect start	15:31:00	1.7	29	26°32.683'N 128°06.213'E
Kayou	2020-09-25	5th transect end	15:37:00	1.8	29	26°32.687'N 128°06.216'E
Kayou	2020-09-25	6th transect start	15:41:00	1.8	29	26°32.690'N 128°06.224'E
Kayou	2020-09-25	6th transect end	15:47:00	1.7	29	26°32.695'N 128°06.227'E
Kayou	2020-09-25	1st swim start	15:54:00	-	-	26°32.722'N 128°06.237'E
Kayou	2020-09-25	1st swim end	16:02:00	-	-	26°32.659'N 128°06.161'E
Kayou	2020-09-25	2nd swim start	16:05:00	-	-	26°32.644'N 128°06.174'E
Kayou	2020-09-25	2nd swim end	16:17:00	-	-	26°32.741'N 128°06.285'E
Kayou	2020-09-25	3rd swim start	16:19:00	-	-	26°32.731'N 128°06.304'E
Kayou	2020-09-25	3rd swim end	16:29:00	-	-	26°32.660'N 128°06.227'E
Kayou	2020-09-25	4th swim start	16:31:00	-	-	26°32.640'N 128°06.243'E
Kayou	2020-09-25	4th swim end	16:41:00	-	-	26°32.711'N 128°06.318'E
Kayou	2020-09-25	5th swim start	16:43:00	-	-	26°32.693'N 128°06.336'E
Kayou	2020-09-25	5th swim end	16:53:00	-	-	26°32.628'N 128°06.261'E
Sesoko	2020-10-02	1st transect start	08:41:00	2.5	27	26°38.196'N 127°52.005'E
Sesoko	2020-10-02	1st transect end	08:47:00	2.1	27	26°38.190'N 127°51.996'E
Sesoko	2020-10-02	2nd transect start	08:54:00	2.7	27	26°38.190'N 127°51.991'E
Sesoko	2020-10-02	2nd transect end	09:00:00	2.3	27	26°38.187'N 127°51.986'E
Sesoko	2020-10-02	3rd transect start	09:04:00	2.4	27	26°38.188'N 127°51.982'E
Sesoko	2020-10-02	3rd transect end	09:12:00	2	27	26°38.184'N 127°51.977'E
Sesoko	2020-10-02	4th transect start	09:16:00	2.4	27	26°38.184'N 127°51.973'E
Sesoko	2020-10-02	4th transect end	09:24:00	2.2	27	26°38.181'N 127°51.968'E
Sesoko	2020-10-02	5th transect start	09:28:00	1.9	27	26°38.181'N 127°51.962'E
Sesoko	2020-10-02	5th transect end	09:39:00	2	27	26°38.178'N 127°51.958'E
Sesoko	2020-10-02	6th transect start	09:43:00	1.7	27	26°38.177'N 127°51.952'E
Sesoko	2020-10-02	6th transect end	09:49:00	2	27	26°38.173'N 127°51.948'E
Sesoko	2020-10-02	1st swim start	09:53:00	-	-	26°38.176'N 127°51.933'E
Sesoko	2020-10-02	1st swim end	10:03:00	-	-	26°38.237'N 127°52.009'E
Sesoko	2020-10-02	2nd swim start	10:05:00	-	-	26°38.225'N 127°52.020'E
Sesoko	2020-10-02	2nd swim end	10:15:00	-	-	26°38.162'N 127°51.936'E
Sesoko	2020-10-02	3rd swim start	10:18:00	-	-	26°38.146'N 127°51.947'E
Sesoko	2020-10-02	3rd swim end	10:28:00	-	-	26°38.217'N 127°52.046'E
Sesoko	2020-10-02	4th swim start	10:38:00	-	-	26°38.267'N 127°52.041'E
Sesoko	2020-10-02	4th swim end	10:48:00	-	-	26°38.342'N 127°52.137'E
Sesoko	2020-10-02	5th swim start	10:50:00	-	-	26°38.332'N 127°52.160'E
Sesoko	2020-10-02	5th swim end	11:00:00	-	-	26°38.268'N 127°52.084'E
Manza	2020-10-04	1st transect start	07:30:00	1.5	27	26°30.126'N 127°50.606'E
Manza	2020-10-04	1st transect end	08:01:00	1.5	27	26°30.131'N 127°50.603'E
Manza	2020-10-04	2nd transect start	08:04:00	1.7	27	26°30.134'N 127°50.601'E
Manza	2020-10-04	2nd transect end	08:10:00	1.5	27	26°30.139'N 127°50.600'E
Manza	2020-10-04	3rd transect start	08:14:00	1.6	27	26°30.141'N 127°50.597'E
Manza	2020-10-04	3rd transect end	08:21:00	1.6	27	26°30.135'N 127°50.598'E
Manza	2020-10-04	4th transect start	08:24:00	1.4	27	26°30.132'N 127°50.595'E
Manza	2020-10-04	4th transect end	08:31:00	1.5	27	26°30.126'N 127°50.569'E
Manza	2020-10-04	5th transect start	08:34:00	1.6	27	26°30.127'N 127°50.589'E
Manza	2020-10-04	5th transect end	08:44:00	1.6	27	26°30.132'N 127°50.589'E
Manza	2020-10-04	6th transect start	08:47:00	1.7	27	26°30.137'N 127°50.587'E
Manza	2020-10-04	6th transect end	08:58:00	1.7	27	26°30.142'N 127°50.589'E
Manza	2020-10-04	1st swim start	09:05:00	-	-	26°30.133'N 127°50.618'E
Manza	2020-10-04	1st swim end	09:13:00	-	-	26°30.085'N 127°50.604'E
Manza	2020-10-04	2nd swim start	09:16:00	-	-	26°30.078'N 127°50.588'E
Manza	2020-10-04	2nd swim end	09:27:00	-	-	26°30.144'N 127°50.611'E
Manza	2020-10-04	3rd swim start	09:29:00	-	-	26°30.144'N 127°50.594'E
Manza	2020-10-04	3rd swim end	09:40:00	-	-	26°30.083'N 127°50.575'E
Manza	2020-10-04	4th swim start	09:42:00	-	-	26°30.076'N 127°50.558'E
Manza	2020-10-04	4th swim end	09:52:00	-	-	26°30.134'N 127°50.576'E
Manza	2020-10-04	5th swim start	09:56:00	-	-	26°30.141'N 127°50.561'E
Manza	2020-10-04	5th swim end	10:06:00	-	-	26°30.069'N 127°50.528'E
Aka	2021-11-19	1st transect start	10:31:00	1.5	25	26.188683,127.279178
Aka	2021-11-19	1st transect end	10:37:00	1.3	25	26.188687,127.279286
Aka	2021-11-19	2nd transect start	10:41:00	1.5	24	26.188571,127.279244
Aka	2021-11-19	2nd transect end	10:48:00	1.3	24	26.188567,127.27938
Aka	2021-11-19	3rd transect start	10:54:00	1.6	24	26.188471,127.2793
Aka	2021-11-19	3rd transect end	10:56:00	1.4	24	26.188504,127.2794
Aka	2021-11-19	4th transect start	11:26:00	1.2	24	26.188978,127.279875
Aka	2021-11-19	4th transect end	11:33:00	1.3	24	26.188985,127.279977
Aka	2021-11-19	5th transect start	11:37:00	1.5	24	26.188875,127.280005
Aka	2021-11-19	5th transect end	11:42:00	1.2	24	26.188889,127.2801
Aka	2021-11-19	6th transect start	11:46:00	1.5	24	26.188751,127.280032
Aka	2021-11-19	6th transect end	11:51:00	1.5	24	26.188773,127.280125
Aka	2021-11-19	1st swim start	11:59:00	-	-	26.188997,127.279217
Aka	2021-11-19	1st swim end	12:09:00	-	-	26.189183,127.280658
Aka	2021-11-19	2nd swim start	12:12:00	-	-	26.189014,127.280741
Aka	2021-11-19	2nd swim end	12:22:00	-	-	26.188688,127.27919
Aka	2021-11-19	3rd swim start	12:25:00	-	-	26.188529,127.279267
Aka	2021-11-19	3rd swim end	12:40:00	-	-	26.188847,127.281363
Aka	2021-11-19	4th swim start	12:43:00	-	-	26.188752,127.281142
Aka	2021-11-19	4th swim end	12:58:00	-	-	26.188169,127.279143
