# Supplementary material for: Shallow epifaunal sea cucumber densities and their relationship with the benthic community in the Okinawa Islands
Source: PeerJ. 2022 Oct 6;10:e14181. doi: 10.7717/peerj.14181 (PMC9548317; doi:10.7717/peerj.14181)
Supplement: Supplemental Information 6 — Each number means cm cover in 1m*6 transects. [file peerj-10-14181-s006.xlsx]

## Sheet: Table S3
	Acropora	Astreopora	Montipora	Pavona	Lobophyllia	Coelastrea	Cyphastrea	Dipsastraea	Favites	Goniastrea	Paragoniastrea	Platygyra	Goniopora	Porites	Psammocora	Leptastrea	Unidentifiable
Odo	11	0	503	125	0	23	0	0	0	8	0	0	0	118	0	0	0
Sesoko	251	6	222	0	19	63	35	19	7	163	30	14	18	182	22	108	6
Manza	36	0	448	87	0	16	2	0	0	31	9	94	0	78	48	0	4
Aka	0	0	318	0	7	0	0	0	0	0	0	0	0	34	0	0	0
