# Supplementary material for: Shallow epifaunal sea cucumber densities and their relationship with the benthic community in the Okinawa Islands
Source: PeerJ. 2022 Oct 6;10:e14181. doi: 10.7717/peerj.14181 (PMC9548317; doi:10.7717/peerj.14181)
Supplement: Supplemental Information 7 — AA = algal assemblage, CA = coralline algae, DC = dead corals, MA = macroalgae, OT = others, RCK = rocky bottom, S = sandy bottom, SCC = scleractinian corals, SM = seagrass meadow, TA = turf algae. [file peerj-10-14181-s007.xlsx]

## Sheet: Table S4
	group	indval	pvalue	freq
S	1	0.704267	0.0002	44
SM	2	0.89094	0.0002	24
MA	2	0.407561	0.0214	22
RCK	3	0.969095	0.0002	25
SCC	3	0.80721	0.0002	22
DC	3	0.597466	0.0002	17
AA	3	0.452915	0.0098	17
CA	3	0.421053	0.0004	8
TA	3	0.368421	0.0018	7
OT	3	0.342214	0.01	11
