# Supplementary material for: Shallow epifaunal sea cucumber densities and their relationship with the benthic community in the Okinawa Islands
Source: PeerJ journal article supplement (doi:10.7717/peerj.14181), 2022-10-06

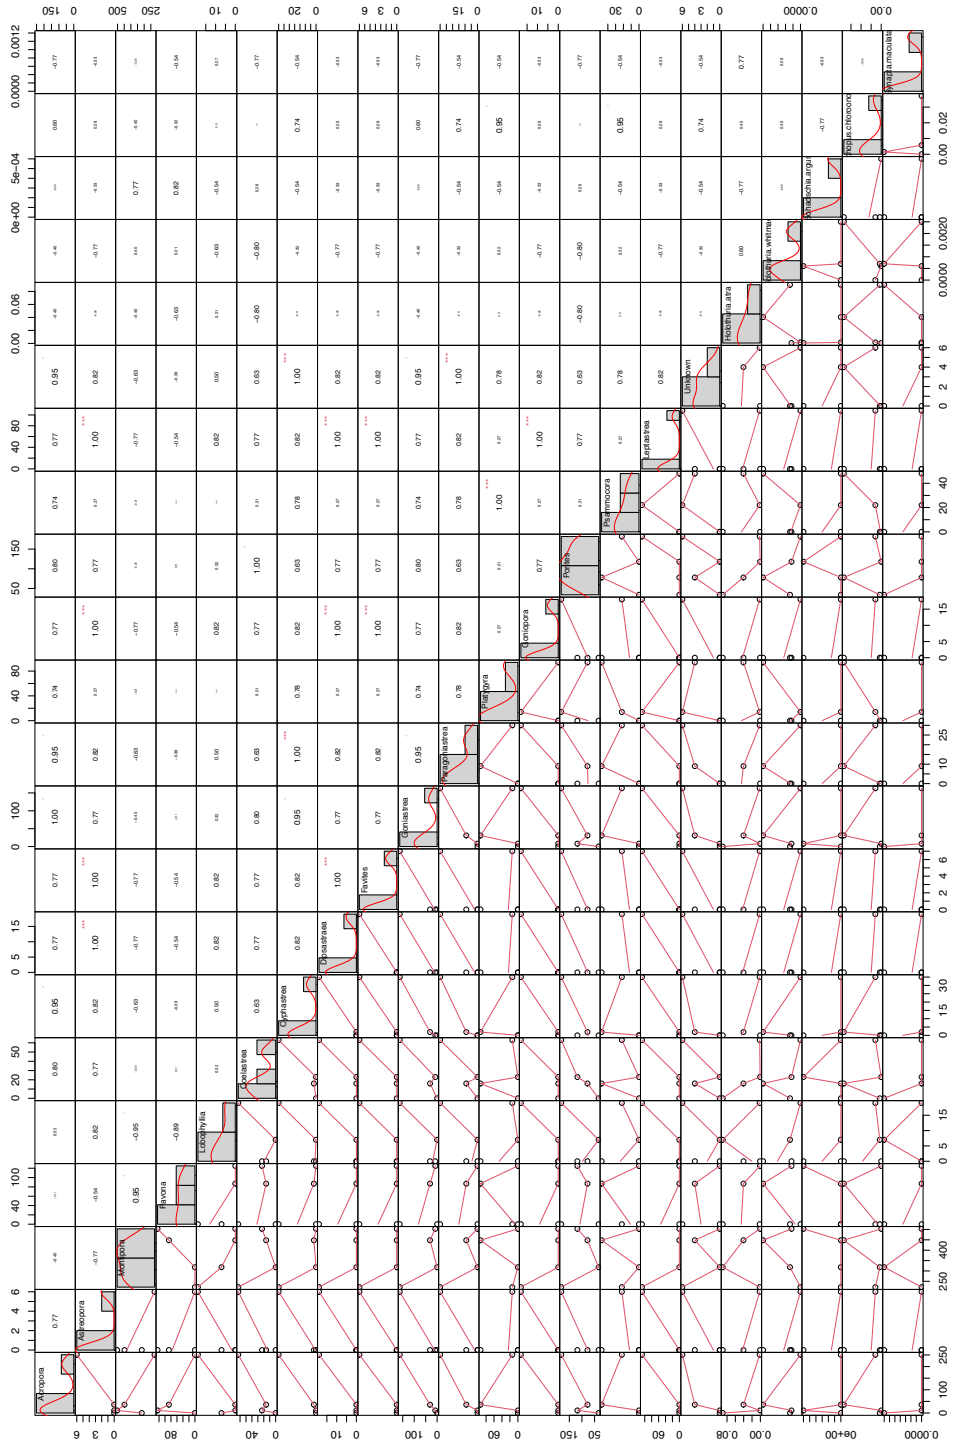

Supplement: supplementary_figure_S3.pdf [file supplementary_figure_S3.pdf]
